# Supplementary material for: CD14 release induced by P2X7 receptor restricts inflammation and increases survival during sepsis
Source: eLife. 2020 Nov 2;9:e60849. doi: 10.7554/eLife.60849 (PMC7690950; doi:10.7554/eLife.60849)
Supplement: Figure 1—source data 1. [file elife-60849-fig1-data1.xlsx]

## Sheet: Figure 1b
Fig 1b
Left panel. wild type macrophages
Sup			EV			Flow through
-	LPS+ATP	LPS+ATP+A438079	-	LPS+ATP	LPS+ATP+A438079	-	LPS+ATP	LPS+ATP+A438079
0	0.421	0	0	1.307	0.187	0	0	0
0	0.187	0	0	1.493	0.467	0	0.187	0
0.125	0.65	0.192	0	0	0	0	0	0
0	0.587	0.086	0	0	0	0	0	0
0	0	0.24	0	1.307	0	0	0	0
0.11	0	0	0.28	0.653	0	0	0	0
0	0	0.099	0	1.145	0.741	0	0.27	0
0.05	0	0	0.539	1.145	0.404	0	0.27	0.067
0	0.32	0				0
0	0.42	0.067
Right panel. wild type and P2X7-KO macrophages
Wild type			P2X7-KO
-	LPS	LPS+ATP	-	LPS	LPS+ATP
0	0	17548	0	1093	6534
0.187	0.467	12041	0	0.653	5787
0	0	12135	0.933	0.653	3307
		19975			1307

## Sheet: Figure 1e
Fig 1 e
ATP	LPS+ATP	IL4+ATP
0.324581	1.18458	0.0873871
0.242742	1.54384	0.0776774
0.199742	0.462424	0.116516
	0.810317
	1.61909

## Sheet: Figure 1g
Fig 1 g
C57BL/6	Nlrp3-/-	Casp 1/11-/-
1.18458	0.171443	0.907396
1.54384	0.193708	0.574891
0.462424	0.458665	0.241696
0.810317
1.61909

## Sheet: Figure 1h
Fig 1 h
LPS	LPS+ATP	LPS+ATP+A438079
81.31	48.26	67.93
77.5	46.79	63.98
73.65	53.76	67.32
69.8	51.89	64.58
74.32	48.7	72.34
68.88	47.31	73.26
