# Supplementary material for: CD14 release induced by P2X7 receptor restricts inflammation and increases survival during sepsis
Source: eLife. 2020 Nov 2;9:e60849. doi: 10.7554/eLife.60849 (PMC7690950; doi:10.7554/eLife.60849)
Supplement: Figure 2—source data 1. [file elife-60849-fig2-data1.xlsx]

## Sheet: Fig 2a
Fig 2 a
Il6								Tnfα
C57BL/6				P2X7 KO				C57BL/6				P2X7 KO
-	LPS	ATP+LPS	ATP+A438079+LPS	-	LPS	LPS+ATP		-	LPS	ATP+LPS	ATP+A438079+LPS	-	LPS	LPS+ATP
0	167	43	146	0.00369	381.99	409.19		2.19889	139.35	81.6057	82.462	0.00369	97.1	69.549
0.00325	90.77	55.872	66.434	0.0304	600.196	484.15		2.29	225.978	60.9139	147.413	0.0304	101.86	158.31
0.0018	93.49	36.94	202.9		651	499.66		2.244	90.609	43.88	182.995	0.01705	93.209	95.07
0.001683	117.1	45.27	138.4	0.01705	544.4	464.3			183.1	62.13	137.6		97.39	107.6
									159.8

## Sheet: Fig 2b
Fig 2 b
IL-6								TNF-α
C57BL/6				P2X7 KO				C57BL/6				P2X7 KO
-	LPS	ATP+LPS	ATP+A438079+LPS	-	LPS	LPS+ATP		-	LPS	ATP+LPS	ATP+A438079+LPS	-	LPS	LPS+ATP
0	4.662	0.1457	1.788	3.69e-06	8.97104	12.1276		0	0.438	0.319231	0.717	0.0014123	1.57177	2.53083
0.00216725	3.708	0.151	1.213	3.04e-05	9.91606	12.598		0.0021	0.473825	0.253	0.746841	0.000821	2.93858	2.218
0.00308028	1.908	0.152	1.449		6.65319	7.44582		0.00356	0.815512	0.389103	0.974277	0	2.4291	1.9094
0.00273786	5.55299	0.08335	2.706	1.705e-05	8.513	10.724			0.47986	0.260052	0.508392	0.001117	2.313	2.219
0.0041078	2.171	0.508	2.636	0	8.742	11.426			0.70254	0.326	0.761	0	2.325	2.219
		0.576155							0.978	0.451	0.357
									0.952274	0.366589	0.783919

## Sheet: Fig 2c
Fig 2 c
Il6								Tnfα
C57BL/6				P2X7 KO				C57BL/6				P2X7 KO
-	MPLA	ATP+MPLA	ATP+A438079+MPLA	-	MPLA	MPLA+ATP		-	MPLA	ATP+MPLA	ATP+A438079+MPLA	-	MPLA	MPLA+ATP
0	35.8714	32.1399	49.6531	0.00369	21.006	28.06		2.19889	117.404	91.7223	45.3841	0.00369	90.088	46.75
0.00325	18.8086	29.4872	42.3097	0.0304	30.331	27.82		2.29	119.235	62.2832	82.5296	0.0304	90.76	99.974
0.0018	18.708	28.653	32.65	0	17.3	63.43		2.244	98.578	86.5	83.5	0.01705	45.899	46.85
0.001683	24.46	30.09	41.54	0.01705	17.69	39.77			111.7	80.17	70.47		75.58	64.52

## Sheet: Fig 2d
Fig 2 d
IL-6								TNF-α
C57BL/6				P2X7 KO				C57BL/6				P2X7 KO
-	MPLA	ATP+MPLA	ATP+A438079+MPLA	-	MPLA	MPLA+ATP		-	MPLA	ATP+MPLA	ATP+A438079+MPLA	-	MPLA	MPLA+ATP
0	2.30385	1.71476	4.06129	3.69e-06	1.15699	1.67285		0	0.461	0.692	0.878	0.0014123	0.314151	0.293788
0.00216725	1.4149	0.946993	2.70643	3.04e-05	1.44213	1.50311		0.0021	0.295	0.438	0.434	0.000821	0.39946	0.337327
0.00308028	1.97091	1.2704	1.80723	0	0.97154	1.45768		0.00356	0.339	0.194	0.301	0	0.29794	0.316951
0.00273786	1.87769	1.45479	2.706	1.705e-05	1.19	1.545		0	0.498238	0.723938	0.407	0.001117	0.3372	0.316
0.0041078	1.924	1.363	2.82	0	1.173	1.524		0	0.303693	0.448594	0.445204	0	0.3257	0.3165
	1.898	1.35						0	0.34881	0.19921	0.309411
								0.0021	0.3488	0.4486	0.4396

## Sheet: Fig 2e
Fig 2 e
Il1b					Il1b
-	LPS	LPS+ATP	LPS+A438079+ATP		-	MPLA	MPLA+ATP	MPLA+A438079+ATP
0.0237542	575.093	165.936	663.157		0.0237542	163.812	176.209	278.459
0.11181	679.921	474.492	535.122		0.11181	157.573	243.367	341.882
0.0406535	518.726	433.082	446.671		0.0406535	212.78	306.145	287.488
0.05874	591.2	357.8	548.3		0.05874	163.8	243.4	287.5
0.0497	583.1	395.4	541.7		0.0497	174.5	242.3	298.8

## Sheet: Fig 2f
Fig 2 f
IL-1β					IL-1β
-	LPS+nigericin	ATP+LPS+nigericin	A438079+ATP+LPS+nigericin		-	MPLA+nigericin	ATP+MPLA+nigericin	A438079+ATP+MPLA+nigericin
0	1.45992	0	2.47627		0	1.85427	0.395326	1.62536
0	1.58849	0.40395	2.96782		0	2.01176	0.488719	2.15423
0	2.21264	0.11	3.19326		0	1.75564	0.379732	1.78835
0	1.754	0.1713	2.879		0	1.874	0.4213
0	1.588	0.11	2.968		0	1.854	0.3953
0	1.721	0.159	2.897		0	1.87	0.4161
