# Supplementary material for: CD14 release induced by P2X7 receptor restricts inflammation and increases survival during sepsis
Source: eLife. 2020 Nov 2;9:e60849. doi: 10.7554/eLife.60849 (PMC7690950; doi:10.7554/eLife.60849)
Supplement: Figure 3—source data 1. [file elife-60849-fig3-data1.xlsx]

## Sheet: Fig 3a
Fig 3 a
CD14			P2X7
Non-septic	Sepsis		Non-septic	Sepsis
1.674	2.962		14.59	273.84
1.355	3.169		18.77	57.77
1.235	2.47		21.1	194.56
1.532	1.255		16.11	319.08
1.369	1.195		56.23	107.46
1.499	1.811		12.75	286.44
1.691	2.201		38.54	80.58
1.856	1.885		18.43	286.44
1.466	4.305		20.91	51.4
1.187			19.81

## Sheet: Fig 3b
Fig 3 b
Serum							Peritoneal exudate
C57BL/6	P2X7-KO	C57BL/6	P2X7-KO	C57BL/6	P2X7-KO		C57BL/6	P2X7-KO	C57BL/6	P2X7-KO	C57BL/6	P2X7-KO
Sham	Sham	CLP 24h	CLP 24h	CLP 48h	CLP 48h		Sham	Sham	CLP 24h	CLP 24h	CLP 48h	CLP 48h
0	0	315.979	111.012	357.676	685.027		4.504	4.792	100.859	96.526	265.346	151.356
0	0	370.131	55.632	1052.86	348.605		3.738	1.917	132.538	56.725	276.041	85.967
0	0	336.692	46.836	670.405	92.332		1.15	0	114.126	101.942	446.486	13.282
0	0	37.515	170.077	72.316	91.051		4.696		14.097	11.826	37.619	16.486
		48.292	62.698	761.135	197.713				19.282	12.874	142.206	35.549
		33.967	75.874	437.32	247.019				17.896	26.053	128.091	52.35
		131.727	87.978	771.486	30.579				16.192	17.409	155.732	27.266
		61.03	88.424	1184.62	106.644				25.546	23.253	236.82	58.801
		89.825	59.374		563.819				44.084	22.616		69.53
		86.067			689.025				72.88	46.378		96.453
										23.444

## Sheet: Fig 3c
Fig 3 c
Serum							Peritoneal exudate
Sham		CLP					Sham		CLP
Saline	A438079	Saline	A438079				Saline	A438079	Saline	A438079
0	0	315.979	132.741				4.792	4.287	100.859	18.773
0	0	370.131	246.193				1.917	3.104	132.538	39.815
0	0	336.692	147.228				0	2.439	114.126	45.38
0		37.515	77.531						24.097	16.334
		48.292	265.631						19.282	41.884
		33.967	175.609						27.896	20.935
		131.727	165.178						26.192	48.311
		61.03	167.437						25.546	44.688
		89.825	230.867						44.084	45.623
		86.067	202.932						72.88
		436.692							76.091
		547.061							70.857
		435.699							91.402
		300.18							86.571
		352.986							105.701

## Sheet: Fig 3d
Fig 3 d
C57BL/6		P2X7-KO
E.V.	E.V. free-SPN	E.V.	E.V. free-SPN
96.296	37.913	45.632	41.324
120.135	41.751	63.671	41.026
111.222	40.045	80.772	41.239
		39.874	34.202
		40.13	34.458
		60.942	37.188
		70.836	36.42
