# Supplementary material for: CD14 release induced by P2X7 receptor restricts inflammation and increases survival during sepsis
Source: eLife. 2020 Nov 2;9:e60849. doi: 10.7554/eLife.60849 (PMC7690950; doi:10.7554/eLife.60849)
Supplement: Figure 4—source data 1. [file elife-60849-fig4-data1.xlsx]

## Sheet: Fig 4a
Fig 4 a
C57BL/6	P2X7-KO	C57BL/6	P2X7-KO	C57BL/6	P2X7-KO
Sham	Sham	CLP 24h	CLP 24h	CLP 48h	CLP 48h
0	0.013	23.236	23.327	21.389	19.887
0.022	0.059	16.389	19.325	11.538	22.857
0.018	0.066	14.852	18.878	22.823	27.915
0.464	0.171	1.362	22.821	1.233	25.17
		4.578	31.467	14.419	18.673
		3.384	18.848	21.462	27.592
		15.145	19.589	21.365	29.736
		21.052	20.741	10.339	29.752
		19.349	21.676
			9.61

## Sheet: Fig 4b
Fig 4 b
	C57BL/6 Sham										P2xr7-/- Sham										C57BL/6 CLP 24h																P2xr7-/- CLP 24h
	R-170		R-178		R-190		R-148		R-192		R-170		R-215		R-195		R-56		R-155		R-158		R-238		R-434		R-433		R-640		R-641		R-642		R-5		R-10		R-17		R-34		R-35		R-1		R-2		R-3
MCSF	0.0390133		0.0334502		0.0500606		0.0264462		0.0107749		0.0306543		0.0376225		0.0376225		0.0271487		0.0466195		0.0773527		0.152942		0.183295		0.0753239		0.124374		0.261085		0.506893		0.36702		2.90645		0.142998		0.398456		0.756651		0.954492		2.2152		1.1058
CRP	0.503326		0.411663		0.273521		3.51759		0.000548812		0.22263		0.434913		1.59617		0.148162		0.101213		0.583797		0.705149		0.492317		0.293482		0.747044		4.59589		0.787339		0.644368		0.000548812		0.532358		0.601281		3.25291		2.5747		0.000548812		0.819644
RAGE	0.44472		0.80439		0.532227		0.744892		0.638487		0		0.223941		0.16077		0		1.67853		0.485795		0.16077		0.403571		0		0.26065		0.211544		0.23625		0.709333		4.63765		0.0922838		0.320727		0.438848		0.52685		1.34399		0.379996
Resistin	0.508428		0.455376		1.20502		0.722084		0.780219		0.422867		0.421411		0.713223		0.434471		0.618657		0.912971		0.991327		0.715855		0.905972		0.779781		0.510321		1.27355		0.91857		0.208399		0.698526		1.38546		1.56089		1.03236		0.959504		0.836729
VEGF	0.146834		0.146834		0.25807		0.082852		0.550629		0.25807		0.23151		0.146834		0.0445577		0.204236		0.596693		0.408789		0.204236		0.527398		0.334976		0.384449		1.14732		0.865387		4.52205		0.408789		0.687552		1.03965		1.03965		0.821305		0.909231
MIP-1	0.000572827		0.0017236		0.00462353		0.000946187		0.00335513		0.00212764		0.00253169		0.00548277		0.000572827		0.000946187		0.927673		0.455628		0.241927		0.0961224		0.231453		1.20556		0.836179		0.640206		0.108111		0.493424		0.284143		0.408625		1.66956		3.3603		1.89345
MIP-1	0.0279133		0.0390867		0.0570464		0.0390867		0.0485746		0.0485746		0.0279133		0.0485746		0.0279133		0.0390867		1.87245		1.86159		0.294959		0.209203		0.212868		1.10128		0.722055		0.541928		0.0648146		0.40848		0.732654		0.56467		1.40942		3.28974		1.83101
MIP-2	0		0		0.00279955		0.00100833		0.00229826		0.00482892		0.00375788		0.00452683		0		0		1.21843		0.865894		0.373894		0.188407		0.212482		1.27373		1.30544		1.24707		0.74987		0.608194		0.674902		1.3286		1.54898		1.50371		1.21313
CCL2	0.0463434		0.0455259		0.0475744		0.0439003		0.0459343		0.0459343		0.0451185		0.0451185		0.0455259		0.0459343		0.569981		0.272972		0.0649991		0.0656564		0.0645615		0.762682		0.510112		0.353657		0.158115		0.136889		0.14768		0.250672		1.0159		3.49307		1.34798
CCL5	0.281153		0.281153		0.311586		0.291339		0.401158		0.301483		0.291339		0.291339		0.245188		0.281153		0.949391		0.565242		0.361641		0.479073		0.371556		1.20084		0.696887		0.853761		0.341715		0.584207		0.410982		0.62198		0.574736		4.16896		1.06221
IL-1	0		0.0401928		0.072136		0.0401928		0.0998105		0		0		0.0401928		0		0		0.383827		0.293206		0.125154		0.274145		0.234797		0.501594		0.311902		0.234797		0.330291		0.293206		0.254692		0.274145		0.747864		1.86392		0.76985
IL-5	0		2.31232		1.68768		0		0.138665		0		0.138665		1.07861		1.01449		0.81728		0.465262		0.138665		0		0.0354159		0		0.38929		0.538808		0.310603		0.138665		0.138665		0.227776		0.310603		0.81728		1.26683		0.610496
IL-10	0		0		0		0		0		0		0		0		0		0		0.76832		0.807308		0.21214		0.220544		0.219179		1.39736		1.51836		0.63775		0.194734		0.171189		0.336375		0.533164		0.923264		4.29298		1.80171

## Sheet: Fig 4c
Fig 4 c
	Sham								Sham + A438079						CLP 24h																CLP 24h + A438079
	R-170		R-178		R-190		R-148		R-50		R-51		R-52		R-155		R-158		R-238		R-434		R-433		R-640		R-641		R-642		R-53		R-54		R-59		R-60		R-61		R-62
MCSF	0.0537682		0.0461011		0.0689936		0.0364481		0.0441745		0.0499346		0.0451328		0.0642511		0.106608		0.210785		0.252617		0.103811		0.171412		0.359828		0.698601		0.895622		2.99762		0.10474		0.497864		0.977974		0.526181
CRP	0.248806		0.203495		0.135208		1.73883		0.170523		0.47608		0.162775		0.0500318		0.288585		0.348572		0.243364		0.145075		0.369282		2.27186		0.389201		0.16477		0.129377		0.272317		0.48132		4.76755		0.184666
RAGE	0.368625		0.666752		0.441158		0.617434		0.696469		1.65654		0.646995		1.39132		0.402671		0.133261		0.334517		0		0.21605		0.175347		0.195826		0.143963		0.617434		0.185623		0.111349		0.392948		0.441563
Resistin	0.500002		0.447829		1.18505		0.710116		0.949191		0.787153		0.757289		0.608404		0.89784		0.974897		0.703991		0.890957		0.766857		0.501864		1.25244		0.821139		0.899131		1.04587		0.962518		1.1706		1.10074
VEGF	0.193088		0.193088		0.339363		0.108951		0.193088		0.304436		0.152635		0.268571		0.784653		0.537559		0.268571		0.693531		0.440494		0.505552		1.50873		0.814784		1.87291		0.60074		0.844706		0.992441		0.87442
MIP-1	0.000522385		0.00157182		0.00421639		0.000862868		0.000522385		0.000522385		0.000522385		0.000862868		0.845984		0.415506		0.220624		0.0876581		0.211072		1.0994		0.762547		0.246067		3.95656		0.126175		0.709814		0.609106		0.352274
MIP-1	0.0306807		0.0429619		0.0627021		0.0429619		0.0429619		0.0306807		0.0306807		0.0429619		2.0581		2.04615		0.324203		0.229944		0.233973		1.21047		0.793642		0.264834		3.31245		0.261097		1.01312		0.72156		0.426932
MIP-2	0		0		0.00259144		0.000933375		0		0		0		0		1.12785		0.801526		0.3461		0.174402		0.196687		1.17904		1.2084		0.992315		1.14576		0.454447		1.1431		1.21369		1.05069
CCL2	0.118186		0.116102		0.121326		0.111956		0.115063		0.116102		0.114026		0.117143		1.45358		0.696142		0.165763		0.167439		0.164647		1.94502		1.30091		0.394539		3.77173		0.148097		0.74948		0.592247		0.343908
CCL5	0.458485		0.458485		0.508113		0.475095		0.458485		0.475095		0.458485		0.458485		1.5482		0.921756		0.58974		0.781239		0.605907		1.95824		1.13643		1.01428		1.59988		0.65418		1.22726		0.702092		0.998919
IL-1	0		0.0578664		0.103856		0.0578664		0.0578664		0.0578664		0		0		0.552603		0.422135		0.180187		0.394693		0.338042		0.722156		0.449052		0.338042		3.52817		0.180187		1.0555		0.449052		0.449052
IL-5	0.215504		2.18774		1.59676		0		0		0		0		0.773248		0.440196		0.131194		0		0.0335079		0		0.368316		0.509779		0.293869		0.64408		0		0.368316		0.293869		0.440196
IL-10	0		0		0		0		0		0		0		0		0.672872		0.707017		0.185786		0.193146		0.19195		1.22377		1.32973		0.405389		3.00902		0.342429		1.07963		0.368654		0.794876
