# Supplementary material for: CD14 release induced by P2X7 receptor restricts inflammation and increases survival during sepsis
Source: eLife. 2020 Nov 2;9:e60849. doi: 10.7554/eLife.60849 (PMC7690950; doi:10.7554/eLife.60849)
Supplement: Figure 5—source data 1. [file elife-60849-fig5-data1.xlsx]

## Sheet: Fig 5a
Fig 5 a
Serum							Peritoneal exudate							Liver
C57BL/6	P2X7-KO	C57BL/6	P2X7-KO	C57BL/6	P2X7-KO		C57BL/6	P2X7-KO	C57BL/6	P2X7-KO	C57BL/6	P2X7-KO		C57BL/6	P2X7-KO	C57BL/6	P2X7-KO	C57BL/6	P2X7-KO
Sham	Sham	CLP 24h	CLP 24h	CLP 48h	CLP 48h		Sham	Sham	CLP 24h	CLP 24h	CLP 48h	CLP 48h		Sham	Sham	CLP 24h	CLP 24h	CLP 48h	CLP 48h
0	0	0.07	1.28	0.001	1.28		0	0	1.3	0.56	0.111	1.3		0	0	1.21	2.17	2.4	4.5
0	0	0	0.07	0.014	0.236		0	0	0.544	1.3	0.162	1.3		0	0	1.2	2.28	2.4	4
0	0	0.001	0	0.058	0.644		0	0	1.3	1.3	1.3	1.3		0	0	1.225	2.155	1.9	3.8
0	0	0	0.02	0	0.324		0	0	0.027	0.157	0.034	1.3						2	4.2
0	0	0.584	1.3	0.18	0.62		0	0	1.3	1.3	1.3	1.52						2.35	3.8
		0	1.6	0.02	1.72				0.18	1.4	1.3	1.45						2	3
		0	0	1.36	0.05				0.96	1.62	2.92	1.6							2.9
			1.5	0.01	0.07				0.081	1.3	1	1.48
		0.26	0.61		0.1				0.108	1.3		1.62
		0.02	0.06						0.05	1.4
			5							1.62

## Sheet: Fig 5b
Fig 5 b
Serum							Peritoneal exudate							Liver
Saline	A438079	Saline + CLP	A438079 + CLP				Saline	A438079	Saline + CLP	A438079 + CLP				Saline	A438079	Saline + CLP	A438079 + CLP
0	0	0.7	42.4				0	0	1.3	4.87				0	0	1.21	2.25
0	0	0	50				0	0	0.544	5.25				0	0	1.2	2.7
0	0	0.01	15				0	0	1.3	2.92				0	0	1.225	1.49
0		0	4				0		0.027	1.64							1.8
0		0	0				0		1.3	4.56							1.6
		0	2						0.18	3.4							2
		0.2	16						0.96	3.5
		0.1	25						0.081	6.2
		0.5	41						0.108	3.2
		0.25	20						0.05	2
		0.6							1.2
		0.5							0.2
									1

## Sheet: Fig 5c
Fig 5 c
Serum		Peritoneal lavage		Liver
Saline	rCD14	Saline	rCD14	Saline	rCD14
0.128	0.001	0.56	0.04	2.17	1.4
0.007	0	1.3	0.12	2.28	1.45
0	0.003	1.3	0.34	2.155	1.5
0.002	0.001	0.157	0.04
0.13	0	1.3	0.056
0.16	0.003	1.4	0.04
0		1.62	0.076
0.15		1.3
0.061		1.3
0.006		1.4
		1.62

## Sheet: Fig 5d
Fig 5 d
Serum		Peritoneal lavage
Saline	rCD14	Saline	rCD14
23.327	18.976	13.728	13.014
19.325	9.631	15.46	3.662
18.878	14.478	4.075	2.69
22.821	10.27	15.119	10.709
31.467	13.34	11	4.792
18.848	16.041	16.534	6.87
19.589	15.283	16.495	2.795
20.741		16.462
21.676		3.718
9.61		8.758

## Sheet: Fig 5e
Fig 5 e
	CLP 24h																		rCD14 + CLP 24h														CLP 48h								rCD14 + CLP 48h
	R-5		R-10		R-17		R-34		R-35		R-1		R-2		R-3		R-6		R-22		R-23		R-26		R-25		R-43		R-44		R-46		R-212		R-68		R-71		R-72		R-38		R-39		R-40
MCSF	0.36702		2.90644		0.142998		0.398455		0.75665		0.954491		2.2152		1.1058		0.152942		0.0841201		0.469356		0		0		0		0		0		0.0507488		0.0264461		0.104315		0.0678466		0		0		0
CRP	0.644368		0.000548812		0.532358		0.601281		3.25291		2.5747		0.000548812		0.819644		0.573645		0.188771		0.362499		0		0		0		0		0		0.259319		0.458705		0.214774		0.213336		0		0		0
RAGE	0.709333		4.63765		0.0922838		0.320727		0.438848		0.52685		1.34399		0.379996		0.550317		0.497526		0.960646		0		0		0		0		0		0.211544		0.26065		0.497526		0.46233		0		0		0
Resistin	0.91857		0.208399		0.698526		1.38546		1.56089		1.03236		0.959504		0.836729		1.39957		0.510806		1.3818		0		0		0		0		0		0.667671		0.698833		1.14234		0.986956		2.8915e-05		0		0
VEGF	0.715175		3.73712		0.337833		0.568209		0.859193		0.859193		0.678745		0.751409		0.49312		0.474119		0.455052		0		0		0		0		0		0.337833		0.377539		1.05419		0.586751		0		0		0
MIP-1	0.640206		0.108111		0.493424		0.284143		0.408625		1.66956		3.3603		1.89345		0.142179		0.0763803		0.864426		0		0		0		0		0		0.258984		0.142179		0.403618		0.0277821		0		0		0
MIP-1	0.541928		0.0648146		0.40848		0.732654		0.56467		1.40942		3.28974		1.83101		0.157281		0.0915572		0.548185		0		0		0		0		0		0.182354		0.306812		0.197966		0.0570464		0		0		0
MIP-2	1.24707		0.74987		0.608194		0.674902		1.3286		1.54898		1.50371		1.21313		0.12554		0.0243307		0.891403		0		0		0		0		0		0.0381059		0.685856		0.137467		0.0198547		0		0		0
CCL2	0.457517		0.204548		0.17709		0.19105		0.324287		1.31424		4.51889		1.74384		0.0685405		0.0696297		0.388008		0.0485365		0.0485365		0.0485365		0.0485365		0.0485365		0.0801423		0.253271		0.0976017		0.0690845		0.0485365		0.0485365		0.0485365
CCL5	0.853761		0.341715		0.584207		0.410982		0.62198		0.574736		4.16896		1.06221		0.381453		0.291339		1.51423		0.17676		0.17676		0.17676		0.17676		0.17676		0.304927		0.331702		0.341715		0.301483		0.17676		0.17676		0.17676
IL-1	0.424064		0.596535		0.529556		0.459997		0.495132		1.35071		3.36641		1.39042		0.387179		0.529556		0.724602		0		0		0		0		0		0.30991		0.459997		0.349203		0.0725918		0		0		0
IL-5	0.731612		0.326618		0.326618		0.536515		0.731612		1.92506		2.98397		1.438		0		0		0.731612		0		0		0		0		0		0		1.92506		0		0		0		0		0
IL-10	0.63775		0.194734		0.171189		0.336375		0.533164		0.923264		4.29298		1.80171		0.108833		0.0129557		0.485029		0		0		0		0		0		0.056731		0.0341243		0.183047		0.00754891		0		0		0
