# Supplementary material for: CD14 release induced by P2X7 receptor restricts inflammation and increases survival during sepsis
Source: eLife. 2020 Nov 2;9:e60849. doi: 10.7554/eLife.60849 (PMC7690950; doi:10.7554/eLife.60849)
Supplement: Figure 6—source data 1. [file elife-60849-fig6-data1.xlsx]

## Sheet: Fig 6a
Fig 6 a
Hours	Sham	A438079+Sham	CLP	A438079+CLP
100	0
100	0
100	0
100	0
100	0
100	0
100	0
100	0
100		0
100		0
100		0
100		0
100		0
100		0
48			1
48			1
48			1
49			1
49			1
50			1
50			1
50			1
50			1
51			1
52			1
53			1
54			1
55			1
40				1
40				1
41				1
42				1
43				1
43				1
44				1
44.5				1
44.5				1
45				1

## Sheet: Fig 6b
Fig 6 b
Hours	Sham C57BL/6	Sham P2xr7-/-	CLP C57BL/6	CLP P2xr7-/-	rsCD14+CLP P2xr7-/-
100	0
100	0
100	0
100	0
100		0
100		0
100		0
100		0
48			1
48			1
48			1
49			1
49			1
50			1
50			1
50			1
50			1
51			1
52			1
53			1
54			1
55			1
42				1
42				1
44				1
44				1
46				1
46				1
46				1
48				1
48				1
42					1
43					1
43					1
44					1
53					1
64					1
65					1
65					1
66					1
