# Supplementary material for: CD14 release induced by P2X7 receptor restricts inflammation and increases survival during sepsis
Source: eLife journal article supplement (doi:10.7554/elife.60849), 2020-11-02

**a**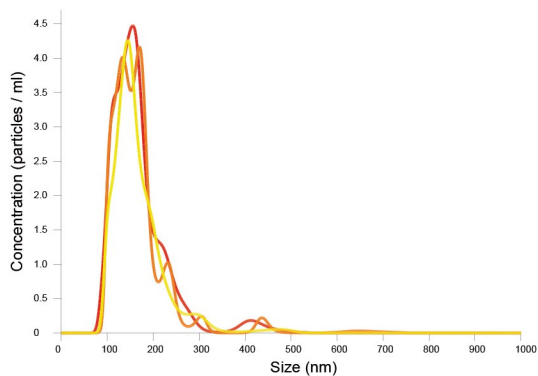**Results**

Stats: Merged Data

Mean: 167.4 nm  
 Mode: 143.8 nm  
 SD: 64.6 nm  
 D10: 109.0 nm  
 D50: 153.5 nm  
 D90: 230.8 nm

Stats: Mean +/- Standard Error

Mean: 167.3 +/- 0.4 nm  
 Mode: 156.9 +/- 7.4 nm  
 SD: 64.2 +/- 3.8 nm  
 D10: 109.2 +/- 0.9 nm  
 D50: 153.5 +/- 0.5 nm  
 D90: 230.5 +/- 2.0 nm  
 Concentration: 4.08e+010 +/- 2.36e+009 particles/ml  
 51.7 +/- 3.0 particles/frame  
 53.3 +/- 2.8 centres/frame

**b**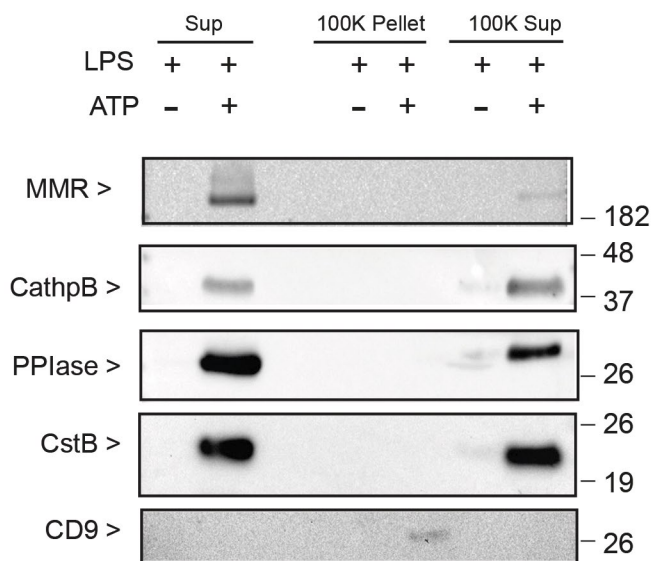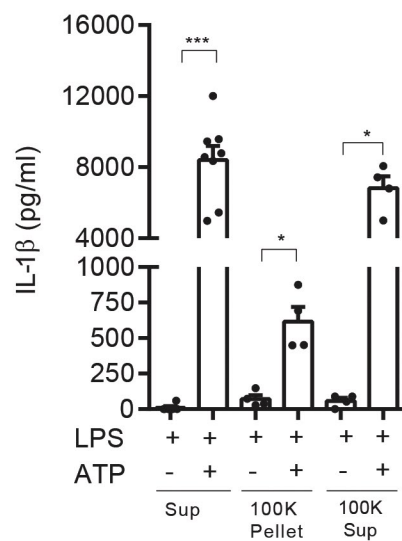**c**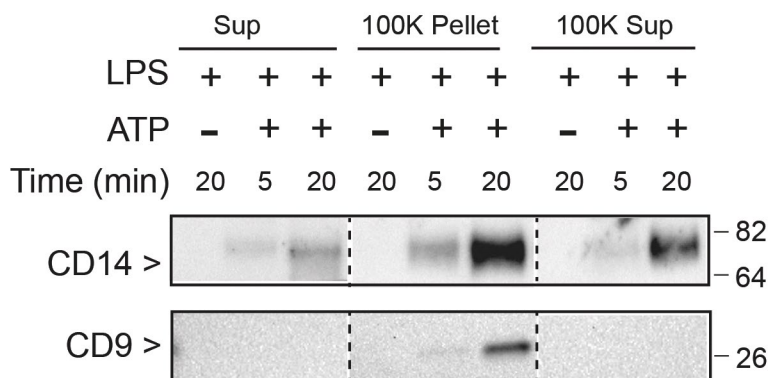

Supplement: supp [file elife-60849-supp-v1.zip]
