# Supplementary figures and images for: CD14 release induced by P2X7 receptor restricts inflammation and increases survival during sepsis
Source: eLife journal article supplement (doi:10.7554/elife.60849), 2020-11-02

**a**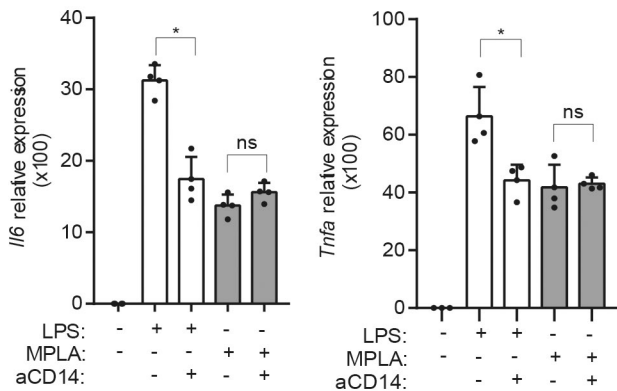**b**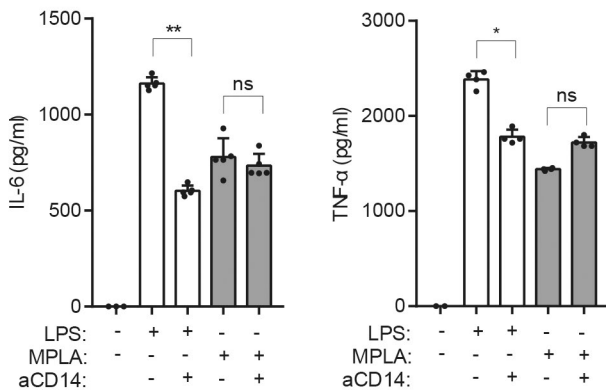

Supplement: supp [file elife-60849-supp-v1.zip]

# C57BL/6

Sham

A438079+Sham

CLP 24h

A438079+CLP 24h

Liver

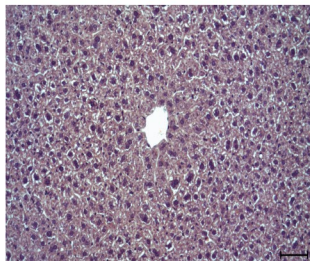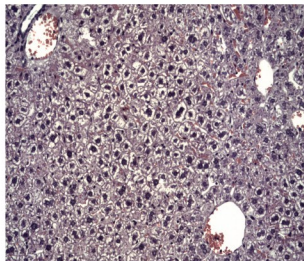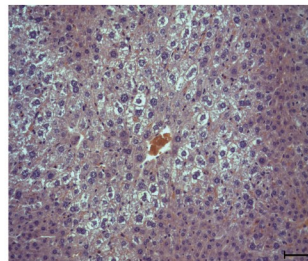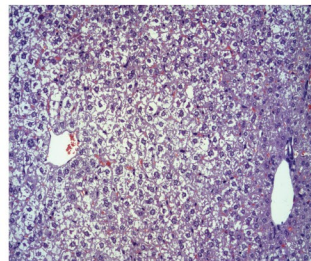

Spleen

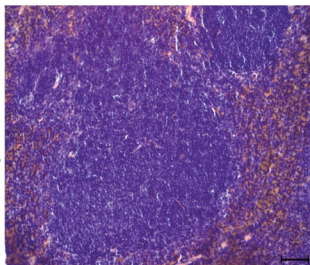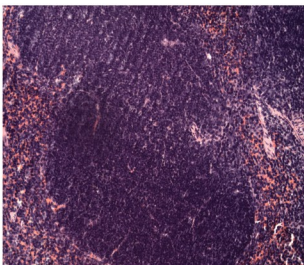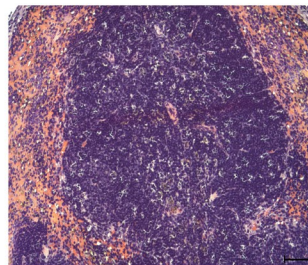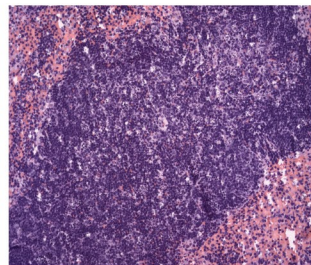

Lung

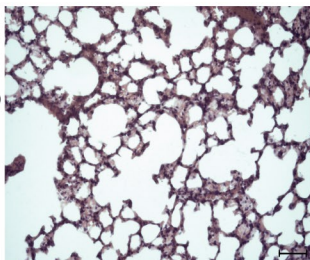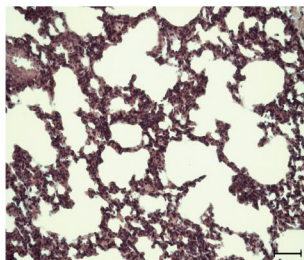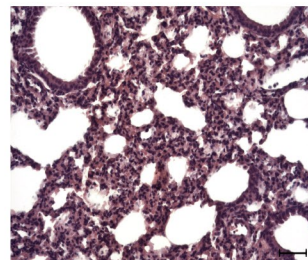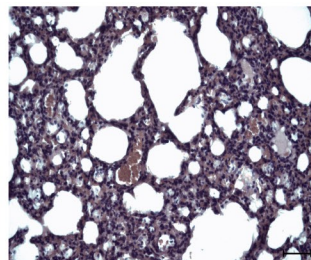

Supplement: supp [file elife-60849-supp-v1.zip]

***P2rx7<sup>-/-</sup>***

Sham

CLP 24h

rCD14+CLP 24h

Liver

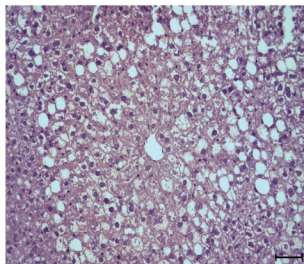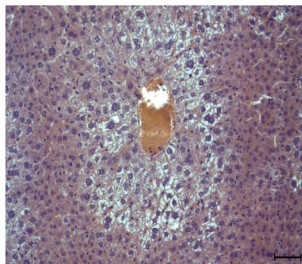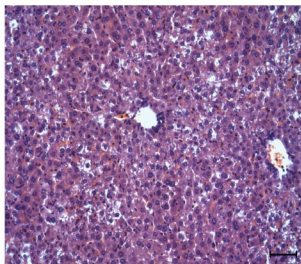

Spleen

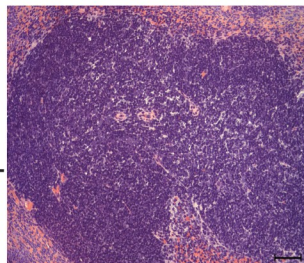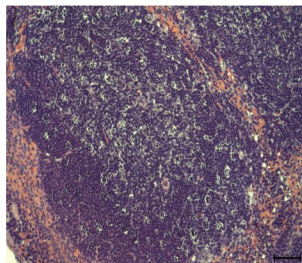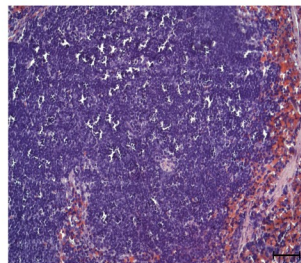

Lung

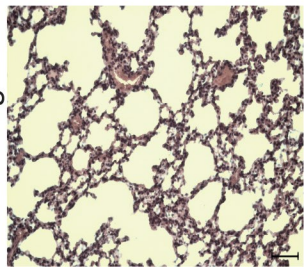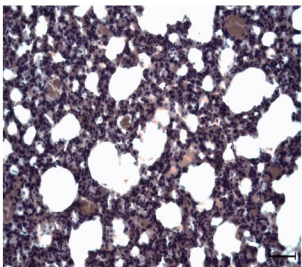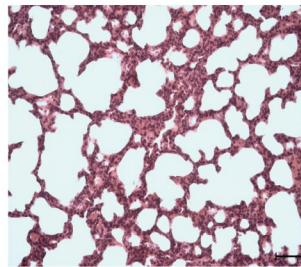

Supplement: supp [file elife-60849-supp-v1.zip]

**a**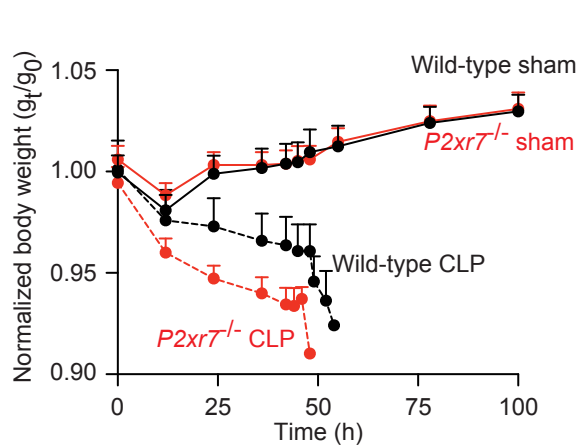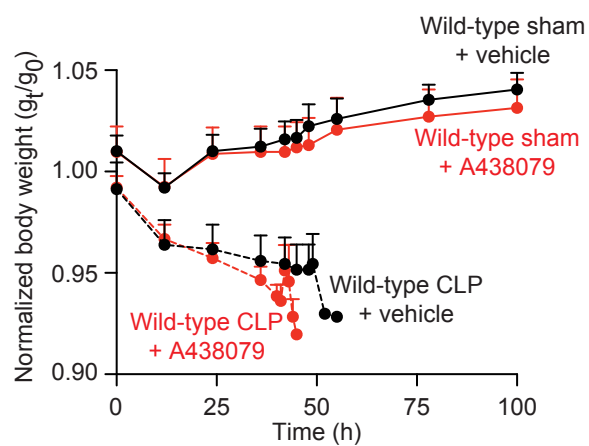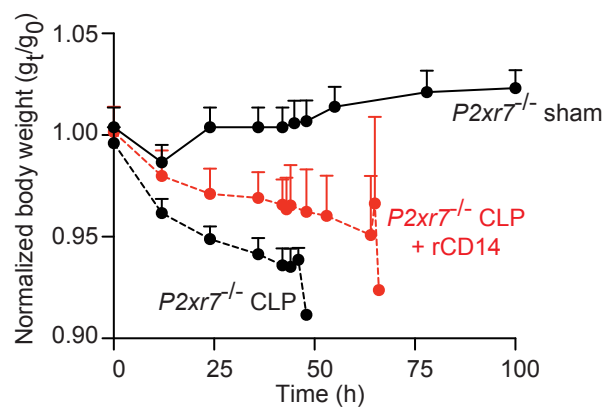**b**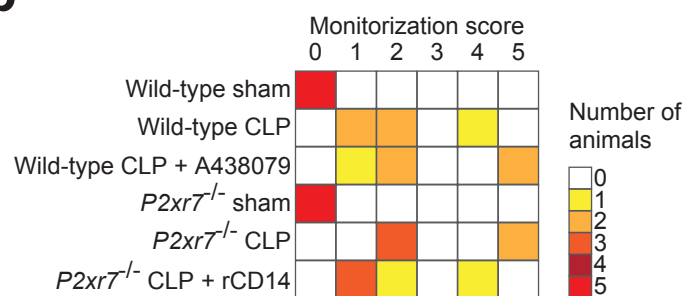**c**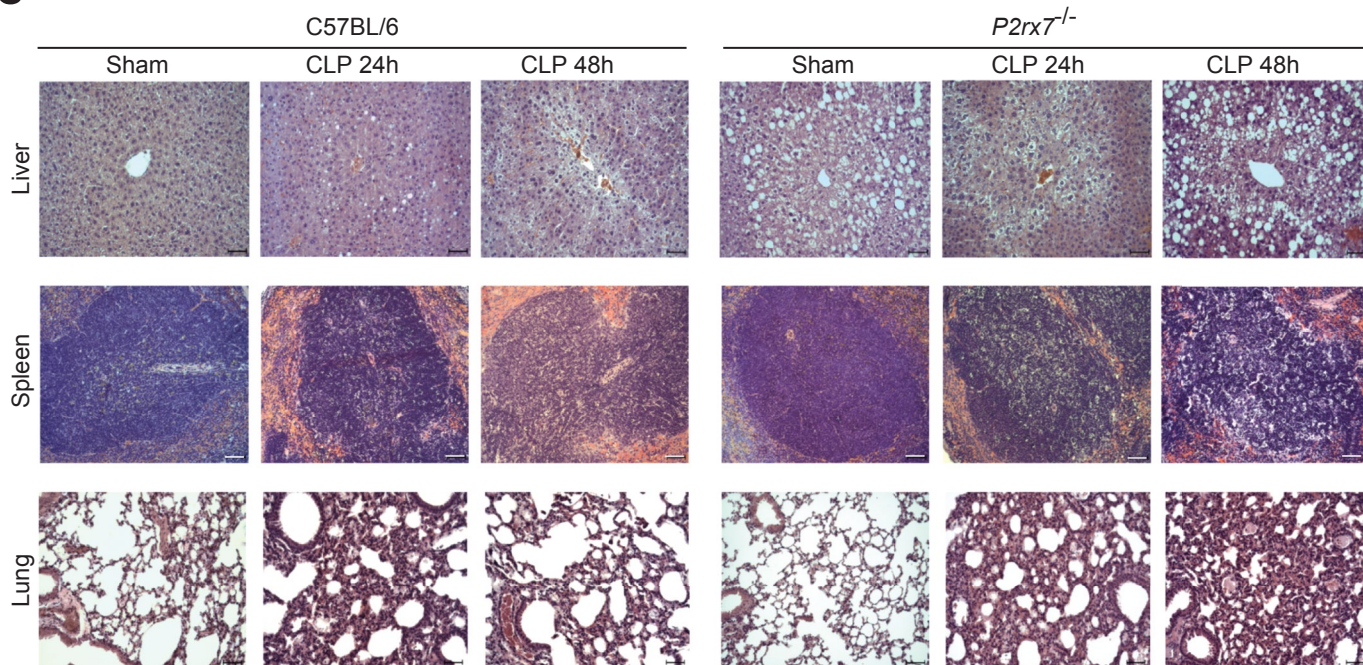

Supplement: supp [file elife-60849-supp-v1.zip]

**a**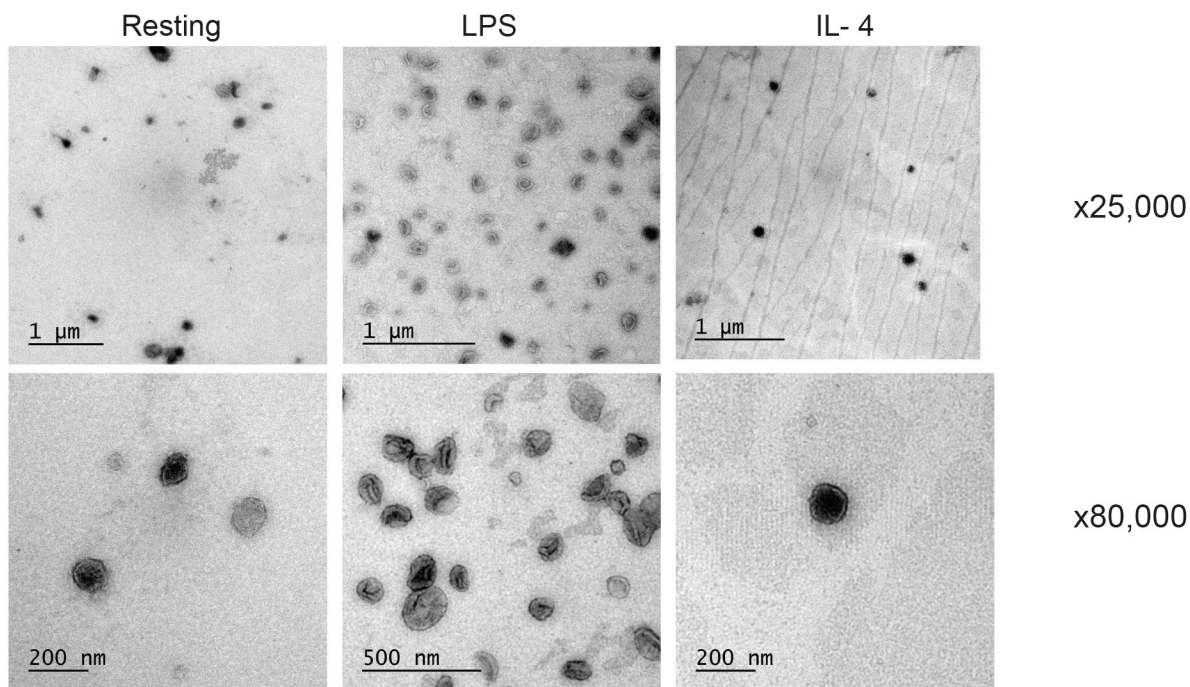**b**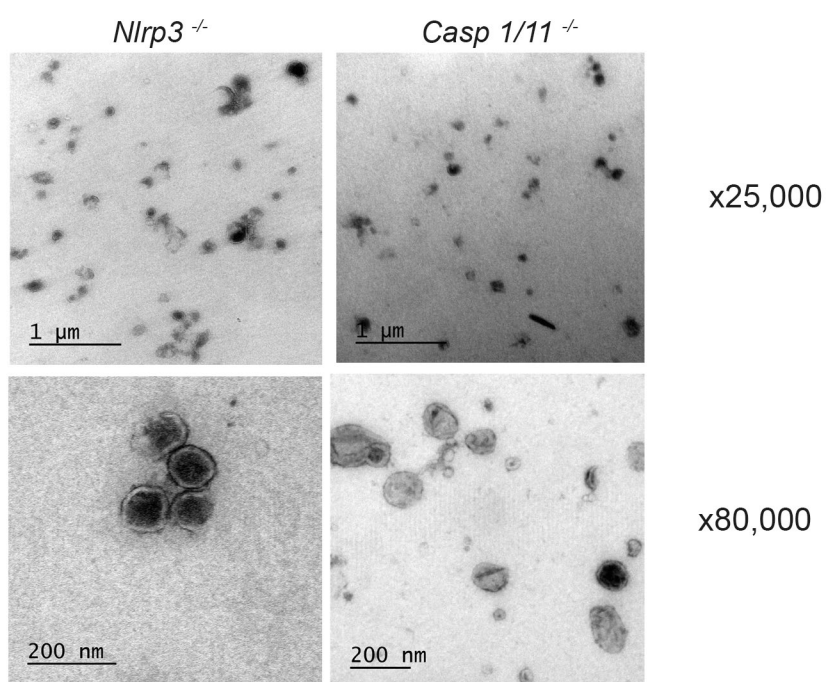**c**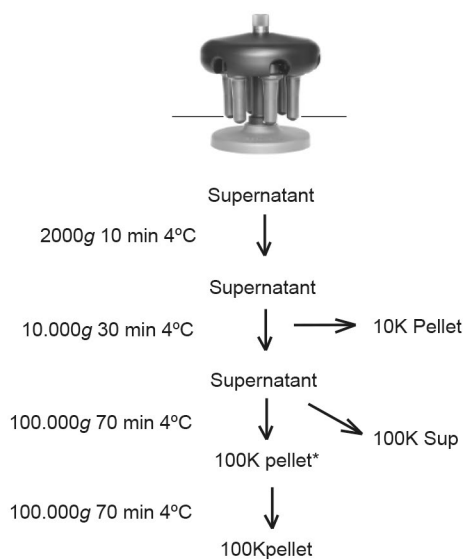**d**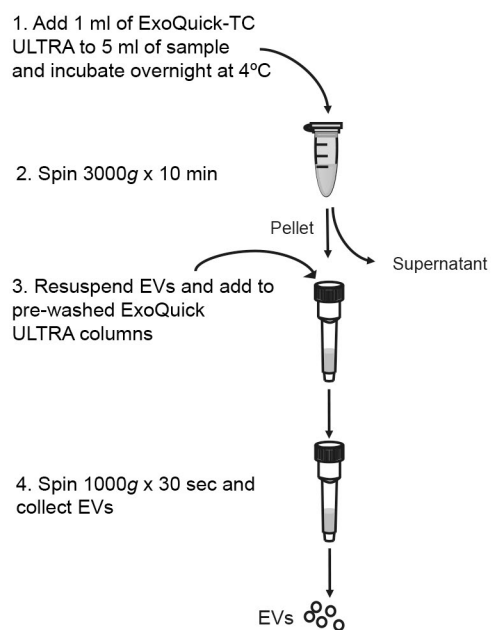

Supplement: supp [file elife-60849-supp-v1.zip]
